# Supplementary material for: Effect of Urate-Lowering Therapy on All-Cause and Cardiovascular Mortality in Hyperuricemic Patients without Gout: A Case-Matched Cohort Study
Source: PubMed Central journal article supplement (PMC4684295; doi:10.1371/journal.pone.0145193), 2015-12-18

S1 Fig. Flow diagram of study design: matched case-cohort study

## Study Design: matched case-cohort study

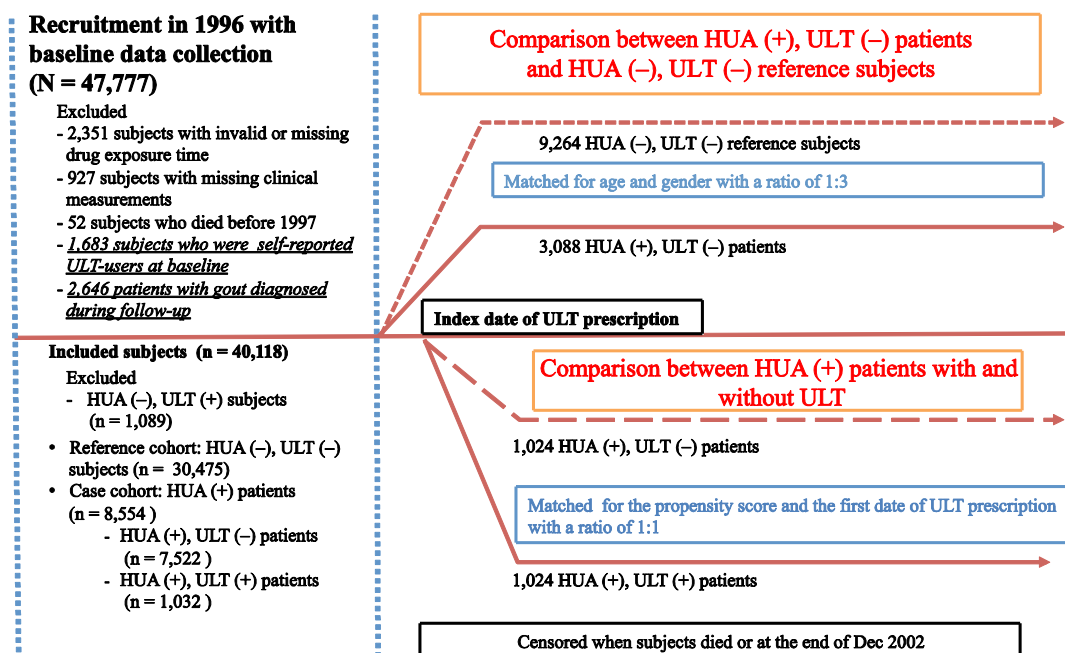

Supplement: pone.0145193.s001.pdf [file pone.0145193.s001.pdf]
