# Supplementary material for: Effect of Urate-Lowering Therapy on All-Cause and Cardiovascular Mortality in Hyperuricemic Patients without Gout: A Case-Matched Cohort Study
Source: PubMed Central journal article supplement (PMC4684295; doi:10.1371/journal.pone.0145193), 2015-12-18
Supplement: pone.0145193.s002.pdf [file pone.0145193.s002.pdf]

**S2 Fig. Survival curves of hyperuricemic patients and the reference non-hyperuricemic, non-ULT individuals.**

**(A)**

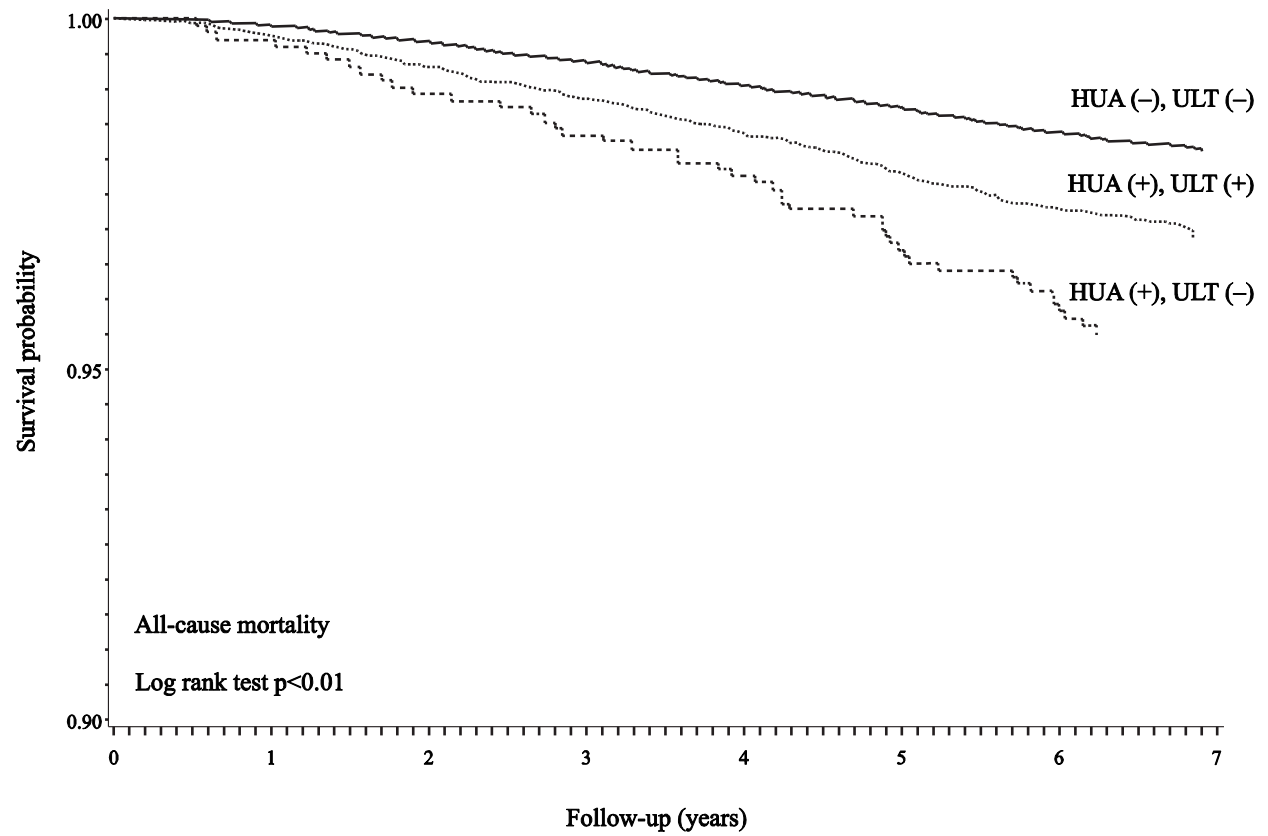

(B)

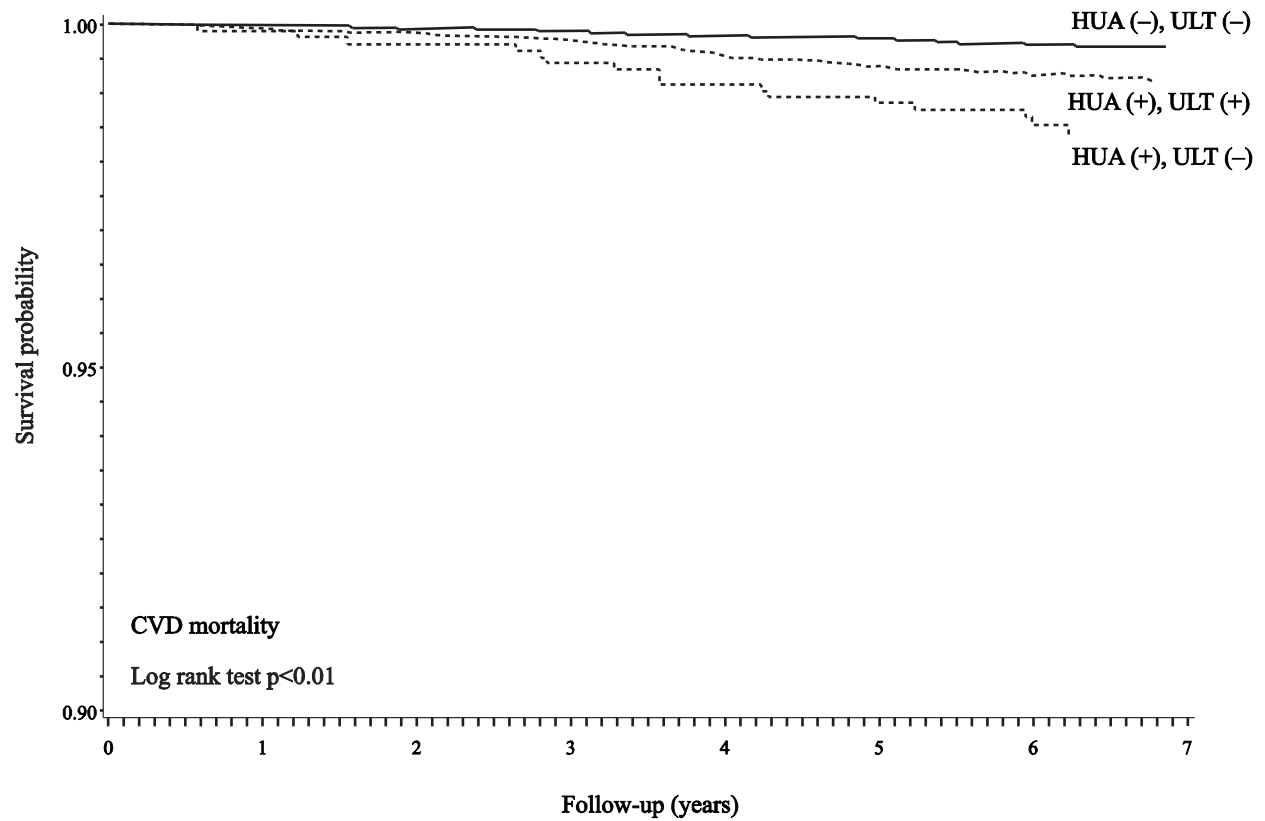

Data for all-cause mortality and CVD mortality are shown for the entire pool of patients (i.e., as shown in Supplementary Table in S1 Table).

Abbreviations: HUA (-), ULT (-): 30,475 non-hyperuricemic, non-gout, non-ULT users;

HUA (+), ULT (-): 7,522 hyperuricemic patients who did not receive ULT;

HUA (+), ULT (+): 1,032 hyperuricemic patients who received ULT
